# Supplementary material for: Effect of Water-Based vs. Land-Based Exercise Intervention (postCOVIDkids) on Exercise Capacity, Fatigue, and Quality of Life in Children with Post COVID-19 Condition: A Randomized Controlled Trial
Source: MDPI journal article supplement (doi:10.3390/jcm12196244), 2023-09-28
Supplement: s1 [file s1]

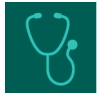

**Table S1.** Cumulative Fatigue Symptoms Questionnaire (CFSQ) for adolescents: complaint rate (%) of individual symptoms severity including general fatigue, decreased vitality, mental overload, somatic symptoms, anxiety and discouragement.

|                                                         | Group          |      |                |      |                   |      |
|---------------------------------------------------------|----------------|------|----------------|------|-------------------|------|
|                                                         | AQUA<br>(n=25) |      | LAND<br>(n=23) |      | CONTROL<br>(n=26) |      |
|                                                         | PRE            | POST | PRE            | POST | PRE               | POST |
| <b>General fatigue</b>                                  | 61             | 60   | 60             | 57   | 54                | 49   |
| <b>Decreased vitality</b>                               | 38             | 40   | 37             | 35   | 42                | 35   |
| <b>Mental overload</b>                                  | 57             | 50   | 50             | 28   | 55                | 54   |
| <b>Somatic symptoms</b>                                 | 34             | 33   | 30             | 33   | 13                | 18   |
| <b>Anxiety</b>                                          | 50             | 44   | 45             | 30   | 36                | 38   |
| <b>Discouragement<br/>about studying and<br/>school</b> | 39             | 34   | 37             | 32   | 45                | 42   |

Data presented as complaint rate (%) of individual symptoms experienced by participants in AQUA, LAND and CONTROL groups.

**Table S2.** Pediatric Quality of Life Inventory 4.0 Generic Core Scales (PedsQL) for parents: physical, emotional, social, school functioning and the total score of the PedsQL.

|                                | Group          |             |                |                |                   |             |
|--------------------------------|----------------|-------------|----------------|----------------|-------------------|-------------|
|                                | AQUA<br>(n=25) |             | LAND<br>(n=23) |                | CONTROL<br>(n=26) |             |
|                                | PRE            | POST        | PRE            | POST           | PRE               | POST        |
| <b>Physical Functioning</b>    | 67.5 (17.8)    | 72.9 (17)   | 68.9 (15.3)    | 81.7 (13)**    | 70.6 (18.8)       | 74.2 (18.2) |
| <b>Emotional Functioning</b>   | 57.2 (19.5)    | 61.5 (16.5) | 59.5 (18.9)    | 70.2 (14.3)**  | 58.2 (20.3)       | 64.2 (21.5) |
| <b>Social Functioning</b>      | 77.2 (17.3)    | 81.7 (13.7) | 80.2 (16.4)    | 88.3 (12.5)*   | 82 (22.1)         | 79.4 (20.5) |
| <b>School Functioning</b>      | 63.8 (17.1)    | 71.3 (16.4) | 66.1 (17.7)    | 75 (15.4)*     | 71.6 (21.3)       | 67.9 (22.4) |
| <b>Total score<br/>PedsQL™</b> | 66.6 (13.6)    | 72 (11.9) † | 68.7 (13.5)    | 79.2 (9.9)** † | 70.6 (17.7)       | 71.8 (17.2) |

Data presented as complaint mean (SD); \*\* $p < 0.01$ ; \* $p < 0.05$ ; † minimal clinically meaningful difference (PRE-POST change  $> 4.5$ ).
